# Supplementary material
Source: Springer Nature journal article supplement (https://www.springermedizin.de/resource/supplementary/12936_2012_2820_MOESM2_ESM.pdf/9544330)
Supplement: MOESM2 [file 9544330]

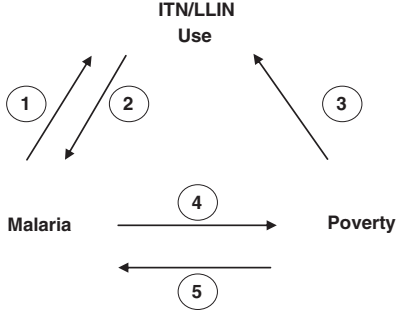

- ① Malaria risk should influence the use of an ITN/LLIN: prevalence elastic behavior.
- ② The efficiency of ITN/LLINs to reduce malaria prevalence is established.
- ③ Poverty is certainly influencing ITN/LLIN use through costs or opportunity costs. ITN could have an indirect effect on poverty through ② & ④
- ④ & ⑤ The relationship between malaria and poverty is certainly bidirectional.
